# Supplementary material for: Heart Failure Therapies for the Prevention of HER2-Monoclonal Antibody-Mediated Cardiotoxicity: A Systematic Review and Meta-Analysis of Randomized Trials
Source: MDPI journal article supplement (doi:10.3390/cancers13215527), 2021-11-03
Supplement: s1 [file s1]

## Supplementary Material

Supplementary Table S1: Search Strategy and Results

| Data Source                                                                                                                                                                                                        |          |               |                 | Limits        |                      |                   |              | Duplicates Results |            |          |      |
|--------------------------------------------------------------------------------------------------------------------------------------------------------------------------------------------------------------------|----------|---------------|-----------------|---------------|----------------------|-------------------|--------------|--------------------|------------|----------|------|
| Database                                                                                                                                                                                                           | Vendor   | Date searched | Database update | English only? | Time Period Searched | Publication types | Other Limits | Items found        | Inner dups | Ext dups | New  |
| Medline/PubMed                                                                                                                                                                                                     | Ovid     | 12/8/21       | -               | No            | No limit             | No limit          | -            | 175                | 0          | 0        | 175  |
| Query: ((breast cancer) AND ((trastuzumab*) OR (pertuzumab))) AND ((prevention) AND (cardiotoxicity))                                                                                                              |          |               |                 |               |                      |                   |              |                    |            |          |      |
| EMBASE                                                                                                                                                                                                             | Elsevier | 12/8/21       | -               | No            | No limit             | No limit          | -            | 703                | 6          | 25       | 672  |
| Query: (breast cancer.mp. or exp breast cancer/ AND (exp trastuzumab/ or trastuzumab.mp. OR exp pertuzumab/ or pertuzumab.mp.) AND (prevention.mp. or exp prevention/OR cardiotoxicity.mp. or exp cardiotoxicity/) |          |               |                 |               |                      |                   |              |                    |            |          |      |
| Scopus                                                                                                                                                                                                             | Elsevier | 12/8/21       | -               | No            | No limit             | Article           | -            | 1653               | 2          | 105      | 1546 |
| Query: ( ( ( ALL ( "breast cancer" ) ) AND ( ALL ( "trastuzumab*" ) OR ALL ( "pertuzumab" ) ) ) AND ( ALL ( "prevention" ) AND ALL ( "cardiotoxicity" ) ) ) AND ( LIMIT-TO ( DOCTYPE , "ar" ) )                    |          |               |                 |               |                      |                   |              |                    |            |          |      |
| Cochrane Library                                                                                                                                                                                                   | Wiley    | 12/8/21       | -               | No            | No limit             | No limit          | -            | 54                 | 2          | 20       | 32   |
| Query: "cardiotoxicity" AND "prevention" in All Text AND "breast cancer" AND ("trastuzumab" OR "pertuzumab") in All Text - (Word variations have been searched)                                                    |          |               |                 |               |                      |                   |              |                    |            |          |      |

|        | Items found | Inner dups | Ext dups | New  |
|--------|-------------|------------|----------|------|
| Totals | 2585        | 10         | 150      | 2425 |

Supplementary Table S2: Summary of Findings Table

| Certainty assessment             |                      |                      |              |                      |                  |                               | Summary of findings   |                              |                          |                                                 |                                                  |
|----------------------------------|----------------------|----------------------|--------------|----------------------|------------------|-------------------------------|-----------------------|------------------------------|--------------------------|-------------------------------------------------|--------------------------------------------------|
| Participants (studies) Follow-up | Risk of bias         | Inconsistency        | Indirectness | Imprecision          | Publication bias | Overall certainty of evidence | Study event rates (%) |                              | Relative effect (95% CI) | Anticipated absolute effects                    |                                                  |
|                                  |                      |                      |              |                      |                  |                               | With placebo          | With heart failure therapies |                          | Risk with placebo                               | Risk difference with heart failure therapies     |
| Cardiotoxicity                   |                      |                      |              |                      |                  |                               |                       |                              |                          |                                                 |                                                  |
| 952 (3 RCTs)                     | not serious          | serious <sup>a</sup> | not serious  | serious <sup>b</sup> | none             | ⊕⊕○○<br>Low                   | 120/471 (25,5%)       | 110/481 (22,9%)              | RR 0,90 (0,63 to 1,29)   | 255 per 1,000                                   | 25 fewer per 1,000 (from 94 fewer to 74 more)    |
| Follow-up LVEF                   |                      |                      |              |                      |                  |                               |                       |                              |                          |                                                 |                                                  |
| 466 (4 RCTs)                     | serious <sup>c</sup> | serious <sup>a</sup> | not serious  | not serious          | none             | ⊕⊕○○<br>Low                   | 236                   | 230                          | -                        | The mean follow-up LVEF ranged from 54,5-59,3 % | MD 2.24 % higher (0.53 higher to 3.94 higher)    |
| Trastuzumab interruption         |                      |                      |              |                      |                  |                               |                       |                              |                          |                                                 |                                                  |
| 740 (2 RCTs)                     | not serious          | not serious          | not serious  | not serious          | none             | ⊕⊕⊕⊕<br>High                  | 98/364 (26,9%)        | 57/376 (15,2%)               | RR 0.57 (0,43 to 0,77)   | 269 per 1,000                                   | 116 fewer per 1,000 (from 153 fewer to 62 fewer) |

CI: confidence interval; MD: mean difference; RR: risk ratio

Explanations

- a. Moderate unexplained heterogeneity
- b. Confidence interval fails to exclude significant benefit or harm
- c. Two included studies (Farahani et al. and Sherafati et al. ) had 'some concerns' on RoB2 assessment, in one domain each

Supplementary Table S3: Risk of Bias Table

| <u>Study ID</u> | <u>Experimental</u>    | <u>Comparator</u> | <u>Outcome</u> | <u>Weight</u> | <u>D1</u>    | <u>D2</u>    | <u>D3</u>    | <u>D4</u>    | <u>D5</u>    | <u>Overall</u> |              |                                            |
|-----------------|------------------------|-------------------|----------------|---------------|--------------|--------------|--------------|--------------|--------------|----------------|--------------|--------------------------------------------|
| Boekhoet 2016   | Candesartan            | Placebo           | Primary        | 1             | <div>+</div> | <div>+</div> | <div>+</div> | <div>+</div> | <div>+</div> | <div>+</div>   | <div>+</div> | <div>+</div> Low risk                      |
| Farahani 2019   | Carvedilol             | No Therapy        | Primary        | 1             | <div>+</div> | <div>!</div> | <div>+</div> | <div>+</div> | <div>+</div> | <div>!</div>   | <div>!</div> | <div>!</div> Some concerns                 |
| Guglin 2019     | Carvidelol/Lisopril    | Placebo           | Primary        | 1             | <div>+</div> | <div>+</div> | <div>+</div> | <div>+</div> | <div>+</div> | <div>+</div>   | <div>+</div> | <div>-</div> High risk                     |
| Pitushkin 2017  | Bisoprolol/Perindopril | Placebo           | Primary        | 1             | <div>+</div> | <div>+</div> | <div>+</div> | <div>+</div> | <div>+</div> | <div>+</div>   | <div>+</div> |                                            |
| Sherafati 2018  | Carvedilol             | No Therapy        | Primary        | 1             | <div>+</div> | <div>+</div> | <div>+</div> | <div>+</div> | <div>!</div> | <div>!</div>   |              |                                            |
|                 |                        |                   |                |               |              |              |              |              |              |                | D1           | Randomisation process                      |
|                 |                        |                   |                |               |              |              |              |              |              |                | D2           | Deviations from the intended interventions |
|                 |                        |                   |                |               |              |              |              |              |              |                | D3           | Missing outcome data                       |
|                 |                        |                   |                |               |              |              |              |              |              |                | D4           | Measurement of the outcome                 |
|                 |                        |                   |                |               |              |              |              |              |              |                | D5           | Selection of the reported result           |
